# Supplementary material for: 6H-Benzo[4,5]thieno[2,3-b]indole as a novel donor for efficient thermally activated delayed fluorescence emitters with EQEs over 20%
Source: Royal Society of Chemistry journal article supplement (doi:10.1039/c9tc04679h), 2019-01-01
Supplement: c9tc04679h1.pdf [file c9tc04679h1.pdf]

## Supporting Information

# **6H-benzo[4,5]thieno[2,3-b]indole as a Novel Donor for Efficient Thermally Activated Delayed Fluorescence Emitters with EQE Over 20%**

*Rajendra Kumar Konidena, Kyung Hyung Lee, and Jun Yeob Lee\**

School of Chemical Engineering, Sungkyunkwan University, 2066 Seobu-ro, Jangan-gu,  
Suwon, Gyeonggi 440-746, Korea

Email: [leej17@skku.edu](mailto:leej17@skku.edu)

|                 |                                                                                                           |    |
|-----------------|-----------------------------------------------------------------------------------------------------------|----|
| <b>Fig. S1.</b> | Emission spectra of the compounds <b>BTITrz</b> (a) and <b>BFITrz</b> (b) collected in different solvents | S2 |
| <b>Fig. S2</b>  | Phosphorescence spectra of the donor and acceptor scaffolds                                               | S2 |
| <b>Chart S1</b> | Chemical structures of the similar kind of materials reported in the literature.                          | S3 |
| <b>Table S1</b> | Comparison of EL performance of similar kind of materials reported in the literature                      | S4 |
| <b>Fig. S3</b>  | <sup>1</sup> H NMR spectra of <b>synBTI</b> recorded in CDCl <sub>3</sub>                                 | S4 |
| <b>Fig. S4</b>  | <sup>1</sup> H NMR spectra of <b>synBFI</b> recorded in CDCl <sub>3</sub>                                 | S5 |
| <b>Fig. S5</b>  | Mass spectra of <b>synBTI</b> .                                                                           | S5 |
| <b>Fig. S6</b>  | Mass spectra of <b>synBFI</b> .                                                                           | S6 |
| <b>Fig. S7</b>  | <sup>1</sup> H NMR spectra of <b>BTITrz</b> recorded in CDCl <sub>3</sub>                                 | S6 |
| <b>Fig. S8</b>  | <sup>13</sup> C NMR spectra of <b>BTITrz</b> recorded in CDCl <sub>3</sub>                                | S7 |
| <b>Fig. S9</b>  | <sup>1</sup> H NMR spectra of <b>BFITrz</b> recorded in CDCl <sub>3</sub>                                 | S7 |
| <b>Fig. S10</b> | <sup>13</sup> C NMR spectra of <b>BFITrz</b> recorded in CDCl <sub>3</sub>                                | S8 |

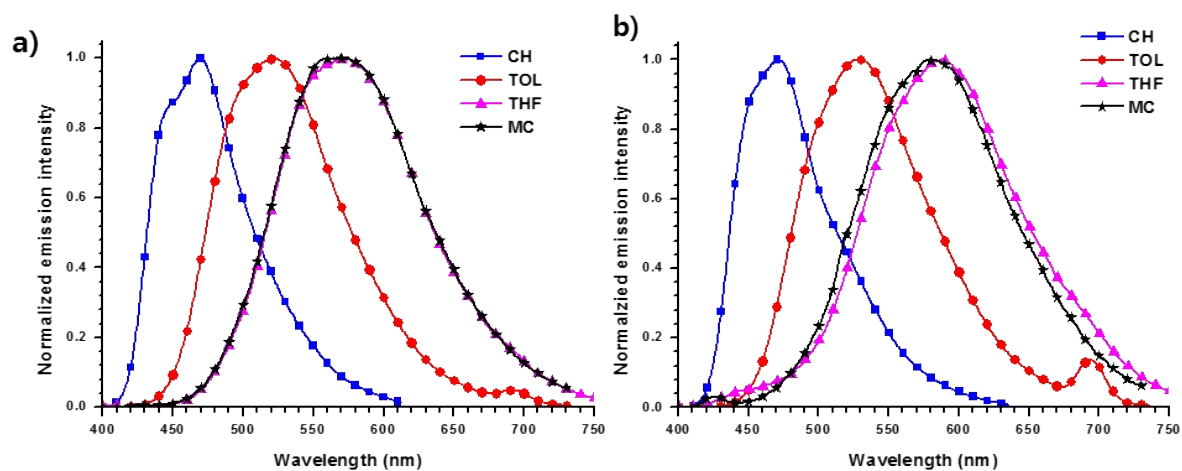

**Figure S1.** Emission spectra of the compounds **BTITrz** (a) and **BFITrz** (b) recorded in different solvents.

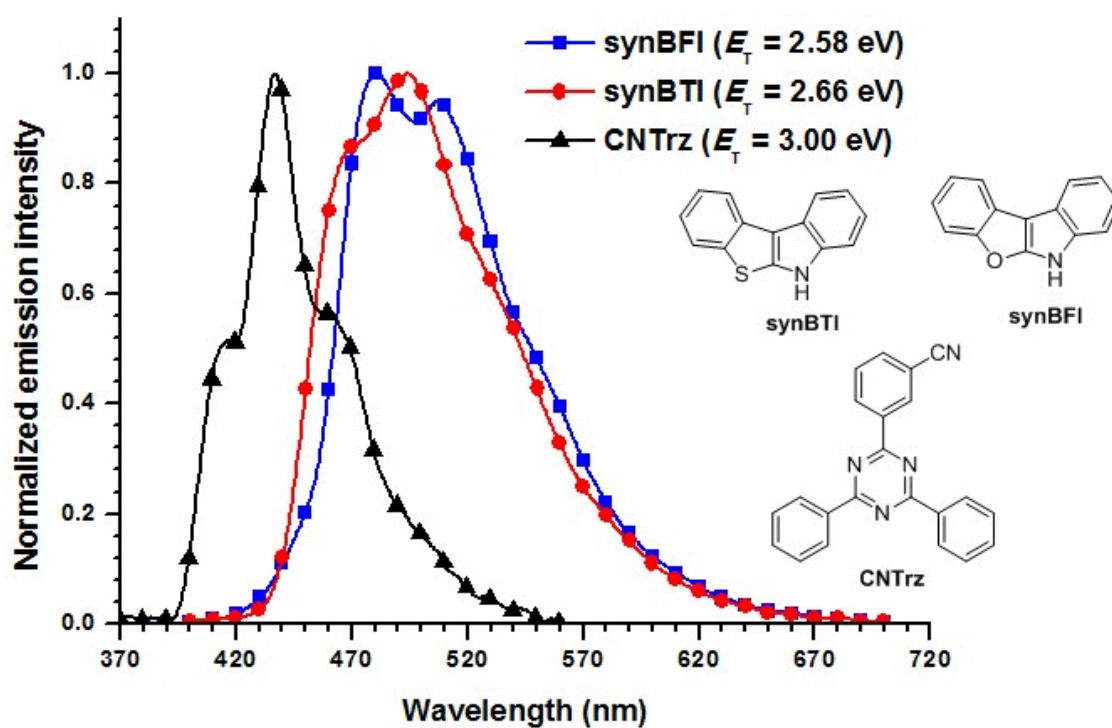

**Figure S2.** Phosphorescence spectra of the donor and acceptor scaffolds.

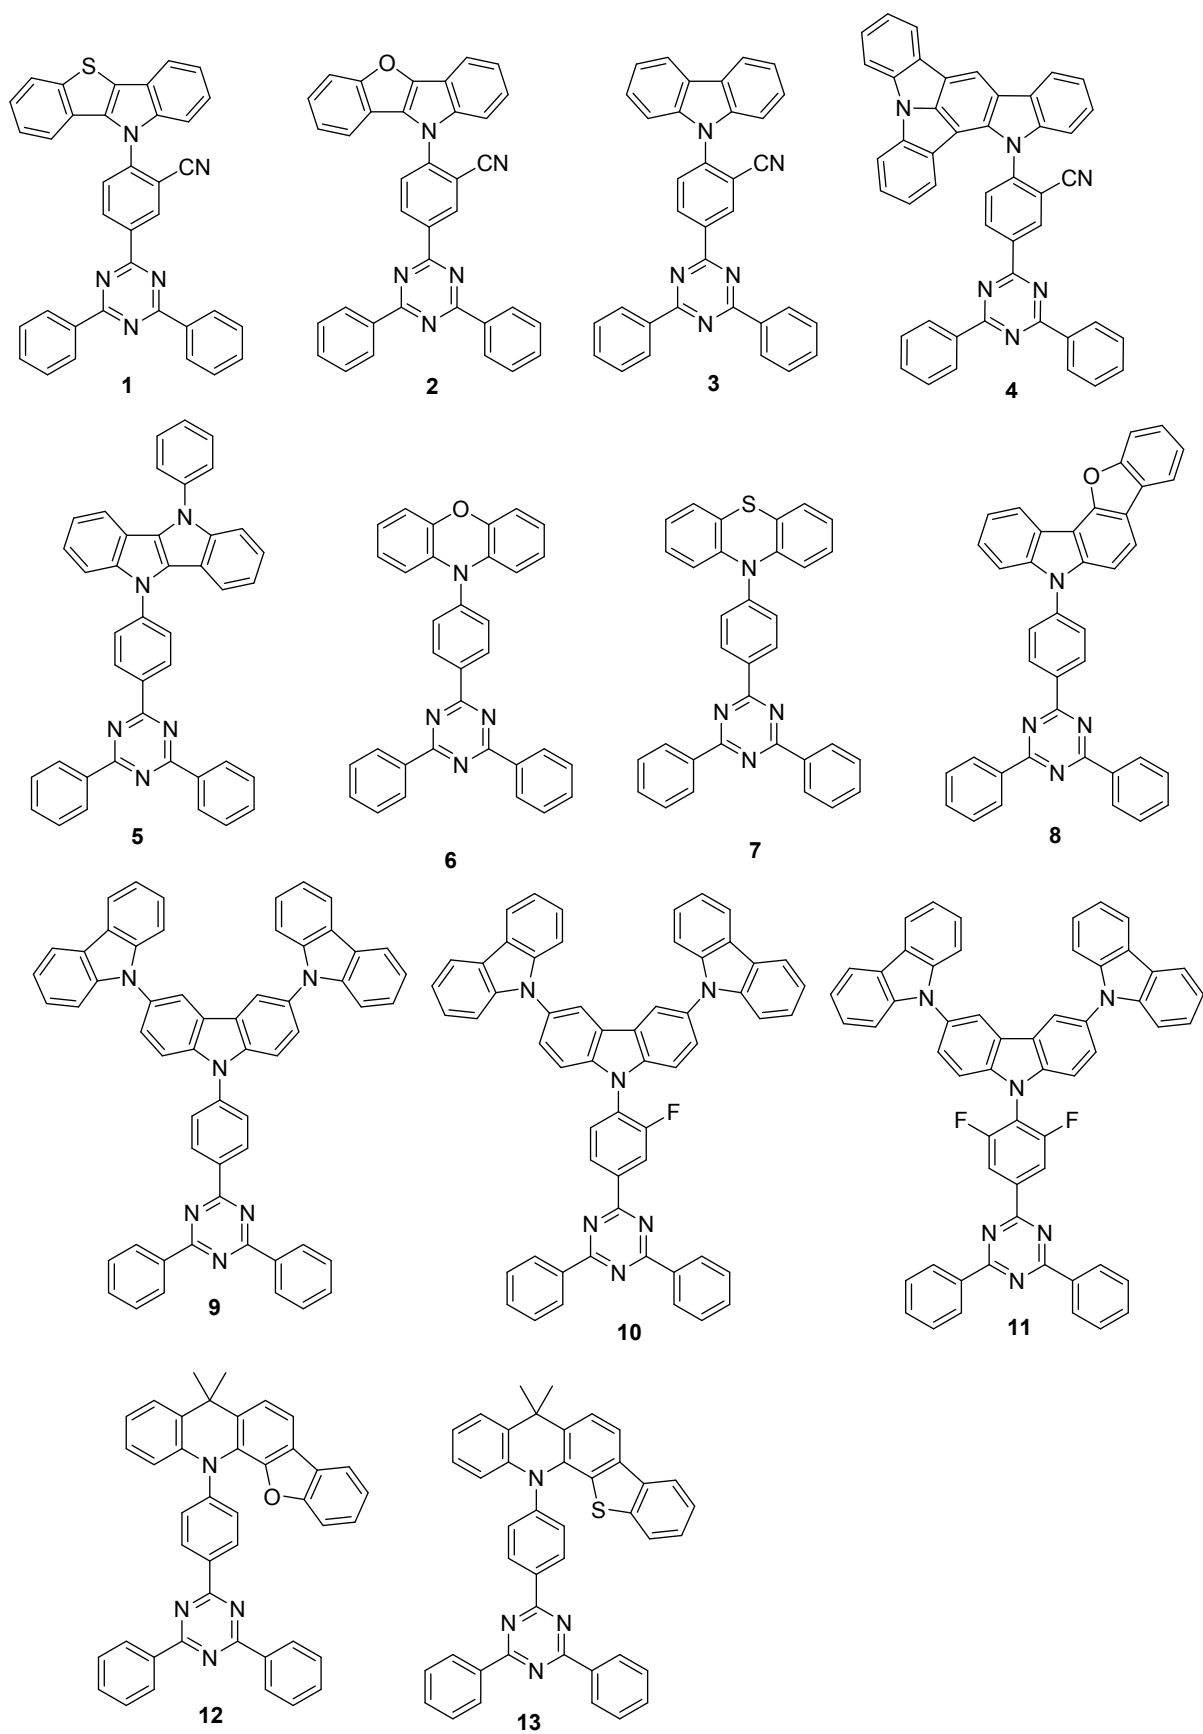

**Chart S1.** Chemical structures of the similar kind of materials reported in the literature.

**Table S1.** Comparison of EL performance of similar kind of materials reported in the literature

| Compound      | $EQE_{\max}/1000 \text{ cd/m}^2$ | $CE_{\max}/1000 \text{ cd/m}^2$ | Ref.      |
|---------------|----------------------------------|---------------------------------|-----------|
| <b>BTITrz</b> | 20.7/15.7                        | 63.6/47.5                       | This work |
| <b>1</b>      | 15.2/13.5                        | 46.8/41.0                       | 1         |
| <b>2</b>      | 6.4/3.5                          | 19.8/10.5                       | 1         |
| <b>3</b>      | 13.9/9.5                         | 18.3/12.3                       | 2         |
| <b>4</b>      | 21.4/18.5                        | 60.3/51.5                       | 2         |
| <b>5</b>      | 20.8/-                           | 56.4/-                          | 3         |
| <b>6</b>      | 12.5/-                           | -                               | 4         |
| <b>7</b>      | 10.8/-                           | -                               | 5         |
| <b>8</b>      | 16.7/-                           | -                               | 6         |
| <b>9</b>      | 17.1/-                           | 28.0/-                          | 7         |
| <b>10</b>     | 22.5/-                           | 56.5/-                          | 7         |
| <b>11</b>     | 19.6/-                           | 52.5/-                          | 7         |
| <b>12</b>     | 20.4/-                           | 58.7                            | 8         |
| <b>13</b>     | 21.8/-                           | 68.9                            | 8         |

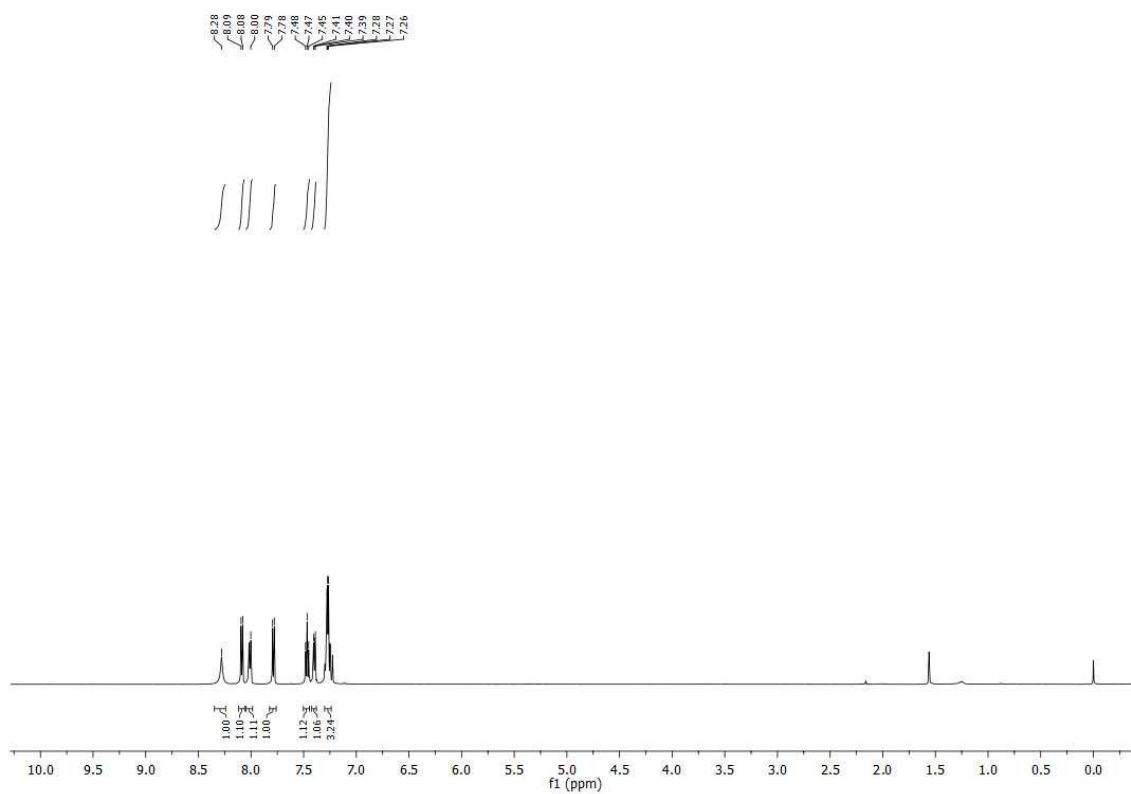

**Figure S3.**  $^1\text{H}$  NMR spectra of **synBTI** recorded in  $\text{CDCl}_3$

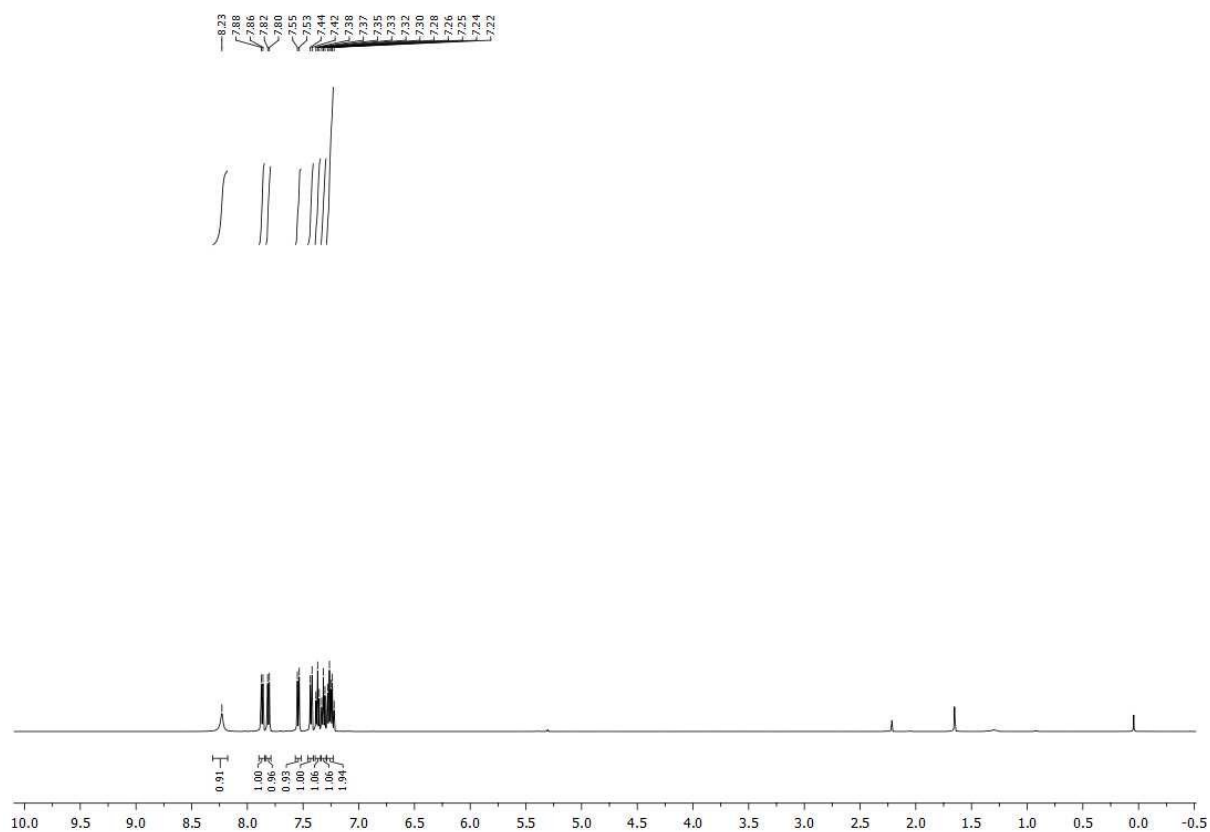

**Figure S4.**  $^1\text{H}$  NMR spectra of **synBFI** recorded in  $\text{CDCl}_3$ .

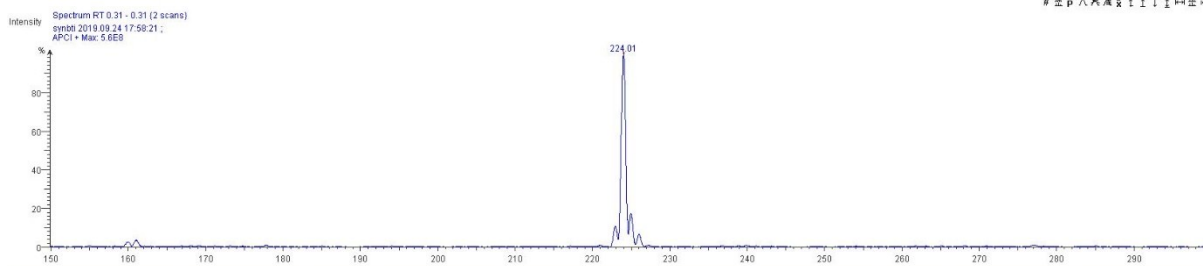

**Figure S5.** Mass spectra of **synBTI**.

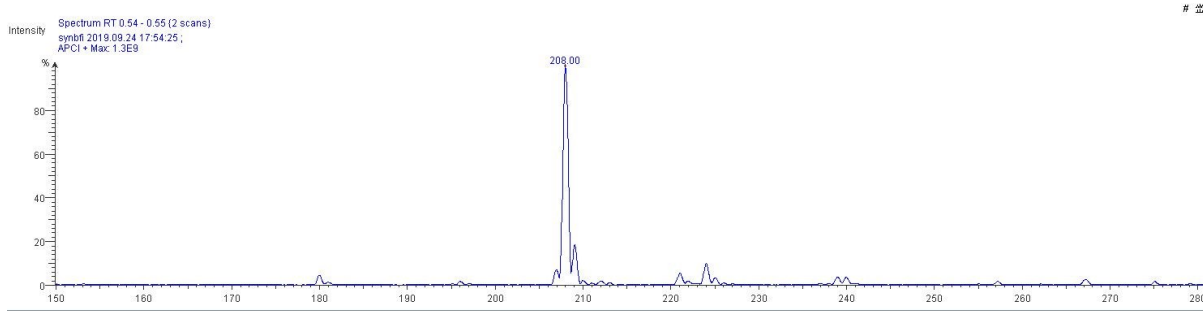

**Figure S6.** Mass spectra of **synBFI**.

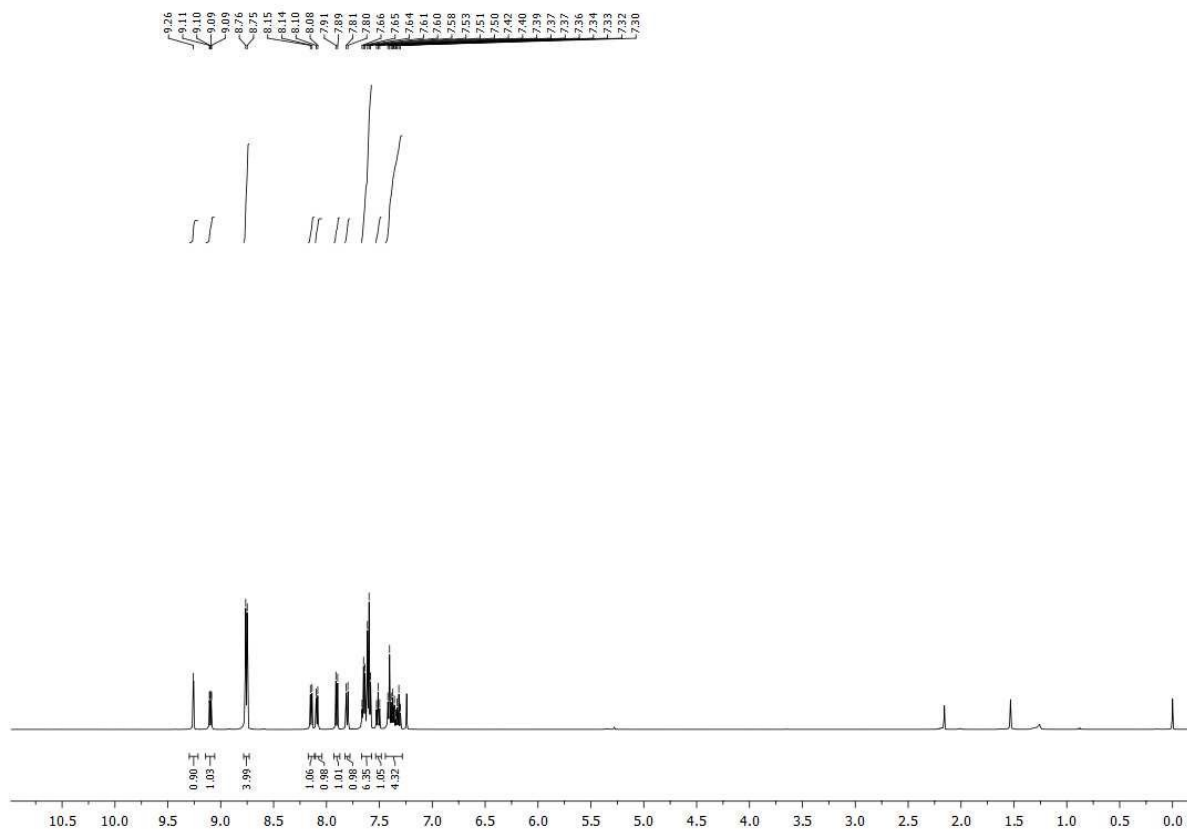

**Figure S7.**  $^1\text{H}$  NMR spectra of **BTITrz** recorded in  $\text{CDCl}_3$

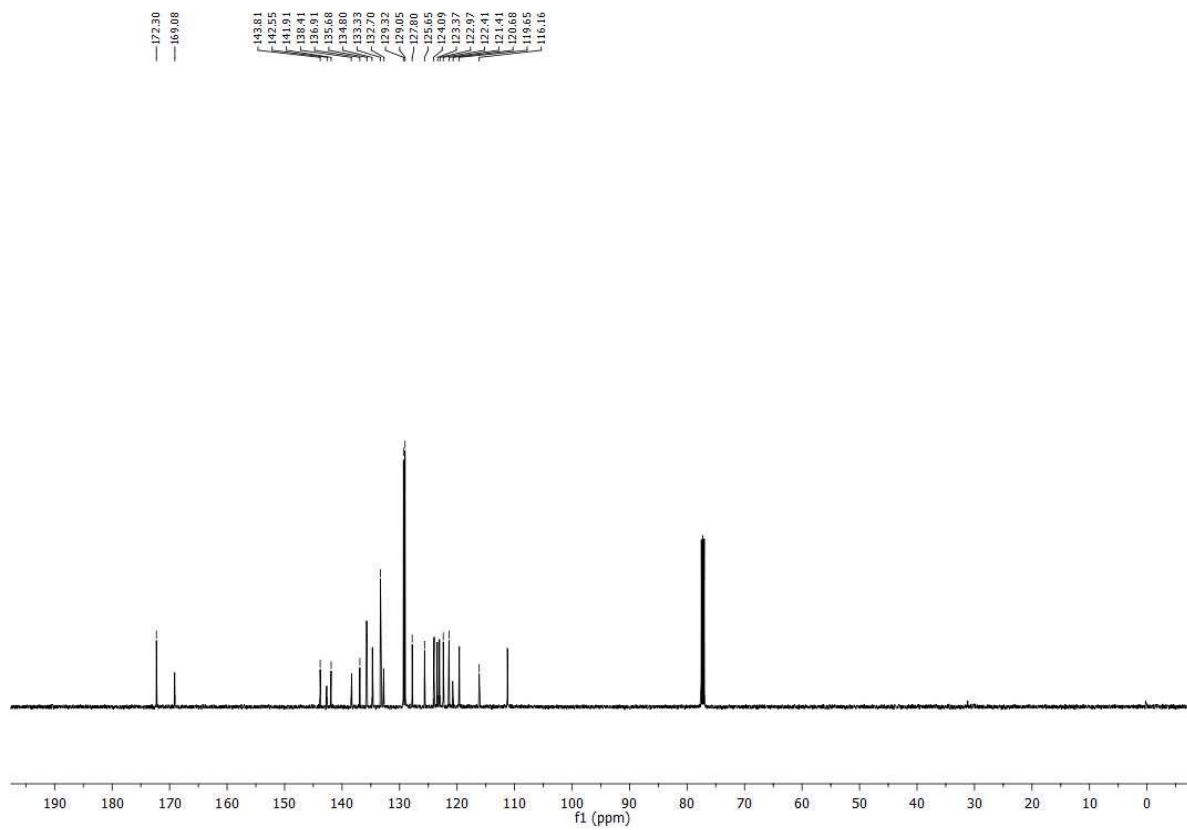

**Figure S8.**  $^{13}\text{C}$  NMR spectra of **BTITrz** recorded in  $\text{CDCl}_3$

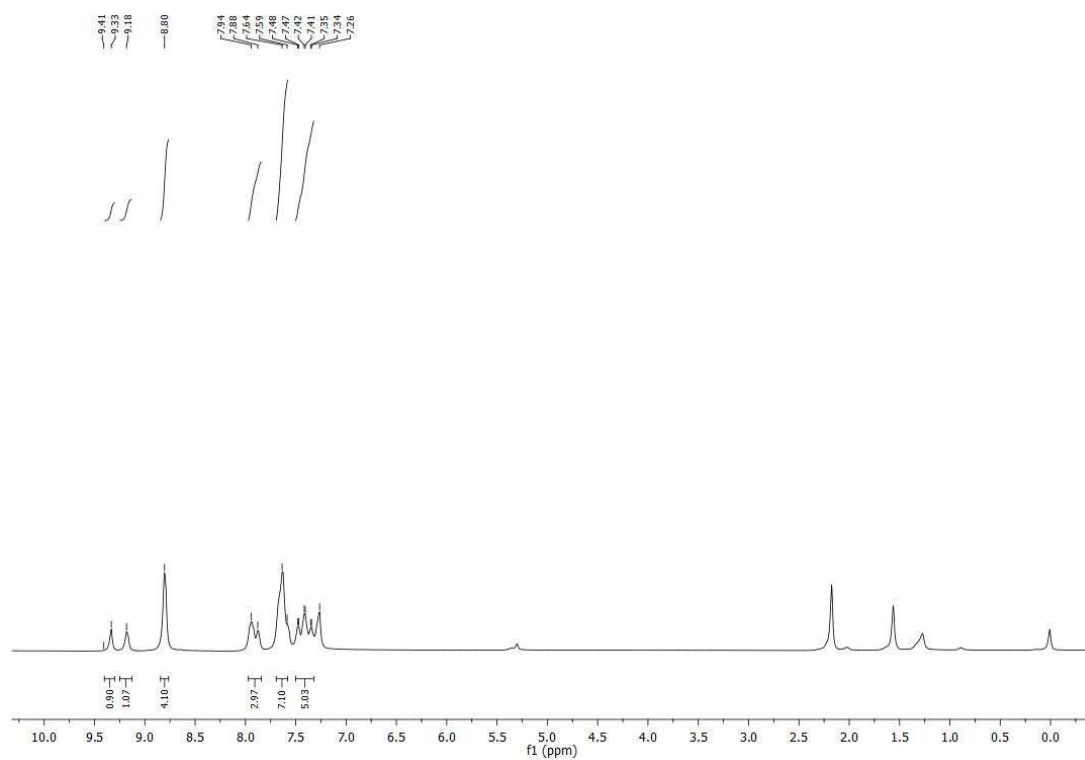

**Figure S9.**  $^1\text{H}$  NMR spectra of **BFITrz** recorded in  $\text{CDCl}_3$

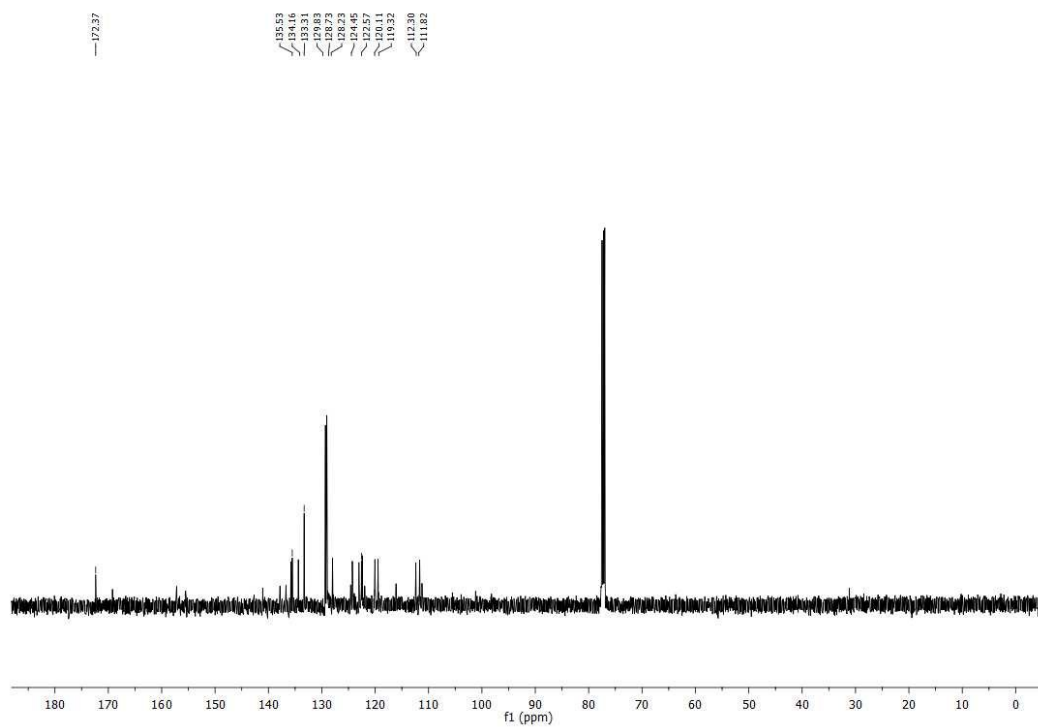

**Figure S10.**  $^{13}\text{C}$  NMR spectra of **BFITrz** recorded in  $\text{CDCl}_3$

## References

1. R. K. Konidena, K. H. Lee, J. Y. Lee and W. P. Hong, *Chem. Asian. J.* 2019, 14, 2251.
2. R. K. Konidena, K. H. Lee, J. Y. Lee, W. P. Hong, *J. Mater. Chem. C*, 2019, 7, 8037.
3. C. H. Ryoo, I. Cho, J. Han, J. H. Yang, J. E. Kwon, S. Kim, H. Jeong, C. Lee, and S. Y. Park, *ACS Appl. Mater. Interfaces*, 2017, 9, 41413.
4. H. Tanaka, K. Shizu, H. Miyazaki and C. Adachi, *Chem. Commun.* 2012, 48, 11392.
5. H. Tanaka, K. Shizu, H. Nakanotani and C. Adachi, *J. Phys. Chem. C*, 2014, 118, 15985.
6. D. R. Lee, J. M. Choi, C. W. Lee and J. Y. Lee, *ACS Appl. Mater. Interfaces*, 2016, 8, 23190..
7. Y. Li, J. J. Liang, H. C. Li, L. S. Cui, M. K. Fung, S. Barlow, S. R. Marder, C. Adachi, Z. Q. Jiang and L. S. Liao, *J. Mater. Chem. C*, 2018, 6, 5536.
8. Y. J. Kang, J. H. Yun, S. H. Han and J. Y. Lee, *J. Mater. Chem. C*, 2019, 7, 4573.
